# Supplementary material
Source: PubMed Central journal article supplement (PMC9597611)
Supplement: NIHMS1834544-supplement-Supplement.pdf [file NIHMS1834544-supplement-Supplement.pdf]

# THE LANCET Oncology

## Supplementary appendix

This appendix formed part of the original submission and has been peer reviewed.  
We post it as supplied by the authors.

Supplement to: Gubbi S, Thakur S, Avadhanula S, et al. Comprehensive guidance on the diagnosis and management of primary mesenchymal tumours of the thyroid gland. *Lancet Oncol* 2020; **21**: e528–37.

## Web Appendix:

### A. Table: Characteristics of primary thyroid mesenchymal tumors.

### B. Figure: A comparison of the molecular basis for the development of mesenchymal tumors and epithelial thyroid tumors:

| A. Table: Characteristics of primary thyroid mesenchymal tumors. * |                                                                                                                                                                                                                                                                                                                                                      |                                                                                                                                                                                                                                                                                                             |                                                                                                                                                                                             |                                                                                                                      |                                                                                                                                                        |                                                                         |
|--------------------------------------------------------------------|------------------------------------------------------------------------------------------------------------------------------------------------------------------------------------------------------------------------------------------------------------------------------------------------------------------------------------------------------|-------------------------------------------------------------------------------------------------------------------------------------------------------------------------------------------------------------------------------------------------------------------------------------------------------------|---------------------------------------------------------------------------------------------------------------------------------------------------------------------------------------------|----------------------------------------------------------------------------------------------------------------------|--------------------------------------------------------------------------------------------------------------------------------------------------------|-------------------------------------------------------------------------|
|                                                                    | Clinical features, treatment and prognosis                                                                                                                                                                                                                                                                                                           | Imaging, FNA, and gross pathology features                                                                                                                                                                                                                                                                  | Histopathology                                                                                                                                                                              | Immunohistochemistry                                                                                                 | Differential diagnosis <sup>§</sup>                                                                                                                    | Pathogenic genetic variants**                                           |
| 1. Paraganglioma                                                   | Reported cases: 76. Mean AODx: 50 years (range: 9 – 78 years); female predilection (~90% of cases); size: 2 – 10 cm. Could be a part of genetic syndromes such as SDHx. Unlike extrathyroidal paragangliomas, catecholaminergic symptoms are rare. About 30% of the tumors can be locally invasive. Surgery is usually curative, recurrence is rare. | US: hypoechoic/heterogenous nodules; cold nodules on scintigraphy.<br>FNA: non-diagnostic/spindle cells. GP: reddish brown, well-circumscribed solid tumors consisting of sclerotic areas.                                                                                                                  | Principal (chief) cells and sustentacular cells, ‘zellballen’ pattern of cellular arrangement.                                                                                              | Principal cells: chromogranin A (+), synaptophysin (+), neuron specific enolase (+); sustentacular cells: S-100 (+). | MTC, Hurtle cell neoplasms, hyalinizing trabecular tumor, atypical follicular adenoma, metastatic carcinoid tumor.                                     | <i>SDHB, SDHC, SDHD, SDHD, SDHA, SDHAF2, TMEM127, and VHL.</i>          |
| 2. Schwannoma                                                      | Reported cases: 37. AODx: usually 10 – 30 years (range: 11 – 80 years); 63% female; size: 2.5 – 6 cm. Usually asymptomatic but rarely present as rapidly enlarging neck masses. Benign PNST; surgery is curative, and recurrence is uncommon, excellent prognosis.                                                                                   | US: hypoechoic nodules (80%), rarely with cystic areas or as hyperechoic nodules. CT: homogeneous, soft-tissue lesions.<br>FNA: paucicellular or spindle cells. GP: yellowish-tan to grey colored, well-circumscribed, firm masses with solid, grey-white cut-surface.                                      | ‘Antony A pattern’ (cell-rich areas), ‘Antony B pattern’ (cell-poor areas), ‘Verocay bodies’ (areas of nuclear palisading)                                                                  | S-100 (+), neuron specific enolase (+).                                                                              | Riedel’s thyroiditis, MTC, ATC, spindle cell variant of thyroid carcinomas, neurofibroma, leiomyoma, malignant PNST.                                   | <i>NF2, TTF1, SMARCB1, LZTR1, TSC1, TSC2, DDR1, ARID1A, and ARID1B.</i> |
| 3. Granular cell tumor                                             | Reported cases: 20. AODx: 11 – 53 years, about 90% female; size: 0.8 – 4.2 cm. Slow-growing neck masses. Mostly benign; surgery is most often curative, excellent prognosis. One patient with tumor invading the tracheal wall; was rendered disease free after surgery.                                                                             | US: hypoechoic nodules (50%). FNA: large, polygonal cells with polymorphic nuclei and inconspicuous nucleoli, syncytial cell borders and prominent eosinophilic cytoplasmic granules. GP: firm, cream to white colored mass with a smooth cut-surface.                                                      | Tumor cells with abundant eosinophilic, granular cytoplasm; cells arranged in clusters/nests; also, presence of thick collagen bundles and large, pink epithelioid cells with bland nuclei. | S-100 (+).                                                                                                           | PNSTs, Hurtle cell neoplasms, paraganglioma, melanoma, histiocytic neoplasms.                                                                          | <i>ATP6AP1, ATP6AP2, and PTPN11.</i>                                    |
| 4. Neurofibroma                                                    | Reported cases: 6. AODx: 14 – 55 years, no sex predilection; clinical features similar to schwannomas; can occur as a part of neurofibromatosis 1. Benign PNST; surgery can be curative.                                                                                                                                                             | Imaging and FNA features are similar to schwannomas. GP: greyish, white, solid masses, with some areas containing mucoid degeneration.                                                                                                                                                                      | Spindle cells, absence of Verocay bodies.                                                                                                                                                   | S-100 (+).                                                                                                           | Schwannoma, leiomyoma, malignant PNST, MTC, ATC.                                                                                                       | <i>NF1, RET.</i>                                                        |
| 5. Hemangioma                                                      | Reported cases: 31. AODx: from 4 – 80 years, common in 4 <sup>th</sup> – 7 <sup>th</sup> decades of life; 2/3 <sup>rd</sup> cases in males; size: 1.8 – 22 cm. Slow-growing masses, intralesional bleeding can cause rapid increase in size. Benign; cured surgically, but potential risk for hemorrhage due to the vascular nature of the tumor.    | US: hypoechoic lesion/multinodular goiter; CT/MRI: hypoenhancing lesion with occasional peri-tumoral calcifications; increased uptake on Tc-99 RBC scan or angiogram. FNA: non-diagnostic/bloody aspirate. GP: encapsulated mass with multifocal hemorrhagic areas with a spongy appearance on cut-surface. | Several dilated, anastomosed vessel lumens lined by flattened endothelial lining; lumens contain erythrocytes.                                                                              | CD34 (+), CD31 (+), ERG (+).                                                                                         | Malignant vascular tumors, intrathyroidal vascular malformations, bloody FNA. Phleboliths in hemangioma can mimic thyroid carcinomas on physical exam. | <i>RAS, PIK3CA.</i>                                                     |
| 6. Leiomyoma                                                       | Reported cases: 7. AODx: usually 40 – 60 years, (also reported in pediatric age group); 70% female; progressively enlarging neck mass; size: 1.5 – 9 cm. Benign; surgery is curative.                                                                                                                                                                | US: solid, hypoechoic lesions; RAIS: cold nodule. FNA: non-diagnostic/spindle cells. GP: greyish colored solid mass, sometimes with cystic regions.                                                                                                                                                         | Fusiform/spindle shaped cells with pale eosinophilic cytoplasm and blunt-ended, cigar-shaped nuclei, forming intersecting fascicles.                                                        | SMA (+), desmin (+).                                                                                                 | Spindle cell variants of thyroid carcinomas, schwannoma, neurofibroma, leiomyosarcoma.                                                                 | <i>HMG2, PLAG1.</i>                                                     |

|                                            |                                                                                                                                                                                                                                                                                                                                                                                                                                                                                                                                        |                                                                                                                                                                                                                                                                                                                                  |                                                                                                                                                          |                                                            |                                                                                                                                                     |                                                                                                                                                                                 |
|--------------------------------------------|----------------------------------------------------------------------------------------------------------------------------------------------------------------------------------------------------------------------------------------------------------------------------------------------------------------------------------------------------------------------------------------------------------------------------------------------------------------------------------------------------------------------------------------|----------------------------------------------------------------------------------------------------------------------------------------------------------------------------------------------------------------------------------------------------------------------------------------------------------------------------------|----------------------------------------------------------------------------------------------------------------------------------------------------------|------------------------------------------------------------|-----------------------------------------------------------------------------------------------------------------------------------------------------|---------------------------------------------------------------------------------------------------------------------------------------------------------------------------------|
| 7. Adenolipoma                             | Reported cases: 30. Average AODx: 53 years (9 – 79 years); 73% female; size: 1 – 25 cm. Asymptomatic neck swelling, occasionally causes compressive symptoms***. Could be associated with <i>PTEN</i> pathogenic variants. Benign; surgery is curative.                                                                                                                                                                                                                                                                                | US: often isoechoic with the thyroid gland due to fat content, rarely hypo- or hyperechoic. CT: hypoenhancing lesion. MRI: hypointense lesion on fat suppression mode. GP: yellowish, soft mass on cut-section.                                                                                                                  | Mature adipose tissue with interspersed thyroid follicles containing benign follicular cells.                                                            | Thyroglobulin (+) in the follicular cells.                 | Thyrolipomatosis, amyloid goiter, dysmorphogenetic goiter, Hashimoto's thyroiditis, angioliopoma, hamartomatous nodule, liposarcoma.                | Unknown.                                                                                                                                                                        |
| 8. Solitary fibrous tumor                  | Reported cases: 47 (including 9 cases of hemangiopericytoma). Mean AODx: 54 years (28 – 88 years); no sex predilection; size: 1.7 – 13.8 cm. Painless neck mass, sometimes causes compressive symptoms. Usually benign; surgery is curative in most cases, but malignant primary thyroid tumors with metastasis have also been reported in 2 patients.                                                                                                                                                                                 | US: solid lesion, rarely cystic regions, data on echogenicity is lacking. CT: heterogeneous enhancing lesion. RAIS: cold nodule. FNA: non-diagnostic/spindle cells with bland cytoplasm and collagenous stroma. GP: well-demarcated, tan-pink to tan-white, firm masses; tan to white cut-surface with occasional cystic areas   | Spindle cells with bland cytoplasm, 'patternless distribution' of cells in the tumor stroma, with ectatic, branching thin-walled vessels.                | STAT6 (+), CD34 (+), CD99 (+), bcl-2 (+).                  | MTC, ATC, PTC with desmoid-type fibromatosis, spindle-cell variants of thyroid carcinomas, SETTLE, malignant TMTs.                                  | <i>NAB2-STAT6</i> gene fusion.                                                                                                                                                  |
| 9. Malignant peripheral nerve sheath tumor | Reported cases: 6. AODx: 22 – 69 years; 85% female (one patient with neurofibromatosis 1). Clinical presentation is similar to benign thyroid PNSTs. Prognostic data is lacking, surgery and chemoradiation has been utilized with limited success.                                                                                                                                                                                                                                                                                    | Imaging and FNA features are similar to benign forms of PNST. GP: fleshy, grey-white mass with areas of necrosis and hemorrhage, sometimes with a dense fibrous capsule.                                                                                                                                                         | Spindle cells with large nuclei and prominent nuclei, frequent mitoses, areas of myxoid or hyalinized tissue and necrosis, cellular and acellular areas. | S-100 (+).                                                 | Schwannoma, spindle cell variants of thyroid carcinomas, rhabdoid variant of ATC, other malignant TMTs with spindle cell morphology.                | <i>TP53</i> , <i>RBI</i> , and <i>CDKN2A</i> , <i>SUZ12</i> and <i>EED</i> .                                                                                                    |
| 10. Malignant vascular tumors              | Reported cases: 68. Most common form of malignant TMT. Includes angiosarcoma, epithelioid hemangioendothelioma. Geographical predilection to Alpine regions. Risk factors: iodine deficiency, exposure to radiation, vinyl chloride. AODx: 6 <sup>th</sup> decade of life; 80% female; size: 5 – 8 cm. Rapidly enlarging neck mass, compressive symptoms, weight loss. Treatment: surgery (potential risk for hemorrhage), chemoradiation, tyrosine kinase inhibitors. Poor prognosis, average survival of 5 months in 57% of patient. | US: hypoechoic/heterogenous nodule, occasional calcifications. CT scan: necrotic mass with invasion into adjacent structures. FNA: malignant cells mimicking undifferentiated carcinoma, epithelioid cells, or bloody aspirate. GP: encapsulated masses with hemorrhagic, necrotic and cystic areas.                             | Epithelioid endothelial cells containing abundant cytoplasm, large vesicular nuclei and prominent nucleoli, lining freely anastomosing channels.         | CD31 (+), CD34 (+), Factor VIII-RA (+), FLI1 (+), ERG (+). | Other malignant TMTs, spindle cell variants of thyroid carcinomas, hemangioma, vascular malformations.                                              | <i>MYC</i> , <i>FLT4</i> , <i>WWTR1-CAMTA1</i> and <i>YAP1-TFE3</i> gene fusions with epithelioid hemangioendothelioma.                                                         |
| 11. Rhabdomyosarcoma                       | Reported cases: 4. AODx: 7 months – 68 years; all individual reported patients are males. Size: ~5 – 6 cm. Can be asymptomatic or can progressively enlarge and cause compressive symptoms. Surgery +/- chemoradiation. Lymph node metastases noted in one patient. Prognostic data is insufficient.                                                                                                                                                                                                                                   | US: hypoechoic nodule. CT: hypoenhancing, heterogeneous mass, evidence of invasion into adjacent structures. GP: sparse data; one report described a white, solid mass with myxoid changes.                                                                                                                                      | Small, round, oval, fusiform/spindle cells with sparse cytoplasm and hyperchromatic nuclei; Rhabdomyoblasts with abundant, eosinophilic cytoplasm.       | Desmin (+), myogenin (+).                                  | Malignant triton tumor, rhabdoid variant of ATC, Ewing sarcoma family of tumors, spindle cell variants of thyroid carcinomas, other malignant TMTs. | <i>PAX5-FOXO1</i> and <i>PAX7-FOXO1</i> gene fusion.<br><br>Others: Genes in the RAS-MAPK pathway, <i>CTNNB1</i> , <i>FGFR4</i> , <i>IGF2</i> , <i>TP53</i> .                   |
| 12. Leiomyosarcoma                         | Reported cases: 32. AODx: Median: 65 years (range: 32 – 90 years, one case reported in a 6-year-old with congenital immunodeficiency); 61% female. Size: 1.9 – 13 cm. Enlarging neck masses with compressive symptoms, weight loss. Distant metastases at diagnosis also has been reported. Treatment: surgery +/- chemoradiation, tyrosine kinase inhibitors. Poor prognosis, median survival of ~5 months.                                                                                                                           | US: hypoechoic or mixed cystic nodule with internal vascularity and calcifications. CT: bulky, necrotic masses with evidence of compression and invasion. RAIS: Cold nodule. FNA: non-diagnostic or undifferentiated malignant cells. GP: greyish colored, solid mass with cystic areas.                                         | Spindle cells with hyperchromatic, blunt ended to pleomorphic nuclei, and with abundant, eosinophilic cytoplasm.                                         | Desmin (+), MSA (+), H-caldesmon (+).                      | Spindle cell variants of thyroid carcinomas, other malignant TMTs with spindle cell morphology, leiomyoma.                                          | <i>TP53</i> , <i>RBI</i> , <i>PTEN</i> and <i>ATRX</i> .                                                                                                                        |
| 13. Liposarcoma                            | Reported cases: 16. Well-differentiated, myxoid, de-differentiated, and pleomorphic sub-types described in the thyroid. AODx: 23 – 82 years; 56% female. Size: 2.5 – 12 cm. Rapidly enlarging neck mass, compressive symptoms, weight loss. Treatment: surgery +/- chemoradiation. Disease is fatal in ~38% of the patients.                                                                                                                                                                                                           | US: hypoechoic/hyperechoic or heterogeneous nodule. CT: hypo- or isodense lesion with compressive or invasive features. MRI: may reveal lipomatous nature of the tumor. RAIS: Cold nodule. FNA: non-diagnostic, suspicious for malignancy, or high-grade malignant cells. GP: soft or hard, often lobulated, greyish-white mass. | Spindle cells and/or lipoblasts with multivacuolization, often presence of myxoid stroma with capillary vessels.                                         | S-100 (+), MDM2 (+).                                       | Lipoma, angioliopoma, metastatic malignant phyllodes tumor, spindle cell variants of thyroid carcinoma, other malignant TMTs.                       | Well-differentiated forms: <i>MDM2</i> , <i>CDK4</i> , <i>HMG2</i> . Myxoid forms: <i>FUS-DDIT3</i> , <i>EWSR1-DDIT3</i> fusions. Pleomorphic forms: <i>RBI</i> , <i>TP53</i> . |

|                                          |                                                                                                                                                                                                                                                                                                                                         |                                                                                                                                                                                                                                                                                                                                                                                                                           |                                                                                                                                                        |                                                       |                                                                                                                                  |                                                                                                                                                                        |
|------------------------------------------|-----------------------------------------------------------------------------------------------------------------------------------------------------------------------------------------------------------------------------------------------------------------------------------------------------------------------------------------|---------------------------------------------------------------------------------------------------------------------------------------------------------------------------------------------------------------------------------------------------------------------------------------------------------------------------------------------------------------------------------------------------------------------------|--------------------------------------------------------------------------------------------------------------------------------------------------------|-------------------------------------------------------|----------------------------------------------------------------------------------------------------------------------------------|------------------------------------------------------------------------------------------------------------------------------------------------------------------------|
| 14. Osteosarcoma                         | Reported cases: 31. Average AODx: 60 years (21 – 97 years), 55% female; size: 9 – 10 cm. Rapidly enlarging neck mass with compressive symptoms. Treatment: surgery +/- chemoradiation. Poor prognosis, mostly fatal within a few months of diagnosis.                                                                                   | US: heterogeneous nodule with extensive calcification. CT: massive intra-tumoral calcifications, invasion into adjacent structures. Increase uptake on bone scintigraphy in one patient. FNA: non-diagnostic/fibrous tissue/spindle- to osteoblast-like cells/similar to ATC. FNA: data is sparse, rarely reported as poorly differentiated or anaplastic carcinoma. GP: hard, greyish mass with extensive calcification. | Spindle- to osteoblast-like cells with pleomorphic nuclei, multinucleated giant cells; Osteoid matrix/osseous metaplasia                               | Vimentin (+).                                         | ATC, MTC, chondrosarcoma, other malignant TMTs, calcified goiter/cyst.                                                           | <i>CDKN2A, TP53, RB1</i> . Chromosomal aneuploidy is also observed.                                                                                                    |
| 15. Ewing sarcoma family of tumors       | Reported cases: 12. Primary Ewing sarcoma and ALES have been described in the thyroid. AODx: 9 – 67 years; 60% male; size: 4 – 6 cm. Progressively expanding neck mass. Treatment: surgery +/- chemoradiation. Mostly favorable outcomes.                                                                                               | US: heterogeneous, hypervascular masses. CT: heterogeneously enhancing masses with compression of adjacent structures. FNA: small cell neoplasm/similar to hematologic malignancy or lymphoma. GP: data is lacking.                                                                                                                                                                                                       | Uniform, medium to large cells, without prominent nucleoli; presence of 'Homer Wright' rosettes. ALES can have squamous pearls, peripheral palisading. | CD99 (+), FLI-1 (+).<br>ALES: p40 (+), pankeratin (+) | MTC, primitive neuroectodermal tumors, hematopoietic malignancies, other malignant TMTs.                                         | <i>EWSR1</i> and <i>ETS</i> family gene-related fusions.                                                                                                               |
| 16. Synovial sarcoma                     | Reported cases: 21. AODx: 12 – 72 years; 63% male; size: 6 – 7 cm (one case up to 17 cm). Rapidly enlarging neck mass, compressive symptoms, weight loss. Treatment: surgery +/- chemoradiation. Lung metastases are common. More than 58% of the patients were alive at the time of follow-up.                                         | US: hypo-, hyper- or isoechoic, hypervascular lesions with rim calcifications. CT: heterogeneous mass compressing on adjacent structures. FNA: dedifferentiated/similar to ATC or MTC/spindle cell neoplasm. GP: greyish white, hard tumor, with or without a fibrous capsule, and with areas of hemorrhage and necrosis                                                                                                  | Monophasic (spindle cells only) or biphasic (spindle cells and epithelioid cells) variants.                                                            | TLE-1 (+), CD99 (+), bcl-2 (+), CD56 (+), EMA (+).    | Spindle cell variants of thyroid carcinomas, rhabdoid variant of ATC, other malignant TMTs, SETTLE, ectopic thymomas.            | <i>SYT-SSX</i> gene fusion.                                                                                                                                            |
| 17. Fibrosarcoma                         | Reported cases: 12 <sup>#</sup> . Two cases associated with history of radiation exposure. AODx: 5 <sup>th</sup> – 7 <sup>th</sup> decade of life; sex predilection data is lacking; size: 5 – 14 cm. Treatment: surgery +/- chemoradiation. Prognostic data is lacking.                                                                | US: heterogeneous masses with calcifications. CT: heterogeneous mass with cystic areas and calcifications. FNA: non-diagnostic/spindle cells. GP: soft or hard, often lobulated, greyish-white mass.                                                                                                                                                                                                                      | Spindle cells arranged in 'herringbone' pattern; pleomorphic cellular nuclei, prominent nucleoli and numerous mitotic figures.                         | Vimentin (+).                                         | Spindle cell variants of thyroid carcinomas, other malignant TMTs with spindle cell morphology, fibromatosis.                    | Mostly unknown. Chromosomal abnormalities (aneuploidy) and several miRNA targets have been reported.                                                                   |
| 18. Chondrosarcoma                       | Reported cases: 4. AODx: 13 – 75 years; 2 male, 1 female, unknown sex in the 4 <sup>th</sup> case; size: 2 – 7 cm. Myxoid and mesenchymal forms have been described in the thyroid (1 case each). Progressively expanding neck swelling with compressive symptoms. Treatment: surgery. Data on chemoradiation and follow-up is lacking. | Imaging data is sparse. US showed a hyperechoic nodule in one patient. CT showed hypoenhancing mass and RAIS revealed a cold nodule in another patient. FNA: non-diagnostic/follicular neoplasm. GP: solid, grey-white or grey-pink tumor with gritty, cartilage-like consistency.                                                                                                                                        | Round to spindle cells, areas of hyalinized cartilage with pleomorphic chondrocytes.                                                                   | S-100 (+).                                            | Chondroma, chondroid metaplasia, osteosarcoma, other malignant TMTs.                                                             | <i>IDH1/2, TP53, and COL2A1</i> . Myxoid forms: Gene fusions involving <i>NR4A3, EWSR1, TAF15, TCF12</i> and <i>TFG</i> . Mesenchymal forms: <i>HEY1-NCOA2</i> fusion. |
| 19. Undifferentiated pleomorphic sarcoma | Reported cases: 27 (including 2 cases of myxofibrosarcoma). AODx: 46 – 78 years; 74% female; size: 2.5 – 15 cm. Progressively enlarging neck mass with compressive symptoms. Treatment: surgery and radiation have been utilized' chemotherapy data is lacking. Poor prognosis, over 75% patients died from the disease.                | US: hypoechoic nodule with coarse calcifications. CT: heterogeneously enhancing mass with extension into or compression of surrounding structures. FNA: non-diagnostic/hemorrhagic aspirate/suspicious for neoplasm. GP: greyish-white to greyish-yellow, often encapsulated, solid mass with areas of cystic degeneration, hemorrhage and necrosis                                                                       | Pleomorphic, sometimes multinucleated to spindle cells arranged in 'storiform' pattern.                                                                | CD68 (+).                                             | Metastatic phyllodes tumor, metastatic metaplastic carcinoma, spindle cell variants of thyroid carcinomas, other malignant TMTs. | <i>CCNE1, VGLL3, and YAP1</i> .                                                                                                                                        |

|                    |                                                                                                                                                                                                                                                                                                                                                                                                                                                                                                                                                                                                                                                                                                                                                                                                                                                                                                                                                                                                                                                                                                                                                                                                                                                                                                                                                                                                                                                                                                                                                                                                                                                                                                                                      |                                                                                                                                                                                                                            |                                          |                                                                                                                       |                                                                                   |                                                                                                                                                                                                  |
|--------------------|--------------------------------------------------------------------------------------------------------------------------------------------------------------------------------------------------------------------------------------------------------------------------------------------------------------------------------------------------------------------------------------------------------------------------------------------------------------------------------------------------------------------------------------------------------------------------------------------------------------------------------------------------------------------------------------------------------------------------------------------------------------------------------------------------------------------------------------------------------------------------------------------------------------------------------------------------------------------------------------------------------------------------------------------------------------------------------------------------------------------------------------------------------------------------------------------------------------------------------------------------------------------------------------------------------------------------------------------------------------------------------------------------------------------------------------------------------------------------------------------------------------------------------------------------------------------------------------------------------------------------------------------------------------------------------------------------------------------------------------|----------------------------------------------------------------------------------------------------------------------------------------------------------------------------------------------------------------------------|------------------------------------------|-----------------------------------------------------------------------------------------------------------------------|-----------------------------------------------------------------------------------|--------------------------------------------------------------------------------------------------------------------------------------------------------------------------------------------------|
| 20. Carcinosarcoma | Reported Cases: 28; AODx: 43 – 80 years; 75% female; size data is sparse; usually ≤6 cm. Progressively expanding neck swelling, compressive features, and weight loss. Treatment: surgery +/- chemoradiation. Poor prognosis, regional and distant metastases are common and usual survival is a few months to 2 years in 93% of patients.                                                                                                                                                                                                                                                                                                                                                                                                                                                                                                                                                                                                                                                                                                                                                                                                                                                                                                                                                                                                                                                                                                                                                                                                                                                                                                                                                                                           | US: heterogeneous echogenicity, with coarse calcifications. FNA: carcinomatous component (PTC, ATC), and spindle cells suggestive of a sarcomatous component. GP: greyish-white mass with areas of hemorrhage and necrosis | Combined areas of carcinoma and sarcoma. | Carcinomatous regions: Pancytokeratin (+), thyroglobulin (+), PAX8 (+), TTF-1 (+); Sarcomatous regions: Vimentin (+). | PTC, ATC, MTC, spindle cell variants of thyroid carcinomas, other malignant TMTs. | <i>KRAS</i> , <i>PIK3CA</i> , <i>TP53</i> , and <i>CCNE</i> in gynecologic carcinosarcoma. One patient with thyroid carcinosarcoma had <i>DICER1</i> pathogenic variant in the neoplastic cells. |
|                    | <p>TMT: Thyroid mesenchymal tumor.<br/> PTC: papillary thyroid carcinoma; MTC: medullary thyroid carcinoma; ATC: anaplastic thyroid carcinoma.<br/> AODx: Age of diagnosis.<br/> US: Ultrasound.<br/> CT: Computed tomography.<br/> MRI: Magnetic resonance imaging.<br/> RAIS: Radioactive iodine scintigraphy.<br/> GP: Gross pathology.<br/> PNST: Peripheral nerve sheath tumor.<br/> SETTLE: Spindle epithelial tumor with thymus-like differentiation.<br/> Tc-99: Technetium – 99.<br/> miRNA: micro-RNA.<br/> ALES: Adamantinoma-like Ewing sarcoma.</p> <p>* Data on certain TMTs such as rhabdomyoma (1 case), follicular dendritic cell sarcoma (3 cases), malignant triton tumor (2 cases), malignant glomus tumor (2 cases), Kaposi sarcoma (5 cases), alveolar soft part sarcoma (1 case), ameloblastic fibrosarcoma (1 case), and malignant mesenchymoma (1 case) are sparse, and these TMTs are not mentioned in the table.<br/> ** Molecular landscape of most TMTs is not entirely known. The genetic variants are provided from data based on both TMTs as well as extra-thyroidal mesenchymal tumors.<br/> *** Compressive symptoms include dysphagia, change in voice, shortness of breath, and neck pain.<br/> # Only includes cases published after 1970. Several cases on “thyroid fibrosarcoma” published prior to 1970 were identified, but the data on these cases were unavailable. It is likely that other forms of TMTs were grouped under the blanket term of “fibrosarcoma” in the older literature.<br/> <sup>s</sup> For all primary malignant TMTs, the likelihood of the TMT being a metastasis from an extrathyroidal primary tumor must be strongly considered during clinical evaluation.</p> |                                                                                                                                                                                                                            |                                          |                                                                                                                       |                                                                                   |                                                                                                                                                                                                  |

**I. List of thyroid mesenchymal tumors and their references from the web appendix table:**

1. Paraganglioma<sup>1-22</sup>
2. Schwannoma<sup>23-34</sup>
3. Neurofibroma<sup>35-40</sup>
4. Granular cell tumor<sup>41-43</sup>
5. Hemangioma<sup>44-49</sup>
6. Leiomyoma<sup>50-56</sup>
7. Adenolipoma<sup>57-63</sup>
8. Solitary fibrous tumor<sup>64-76</sup>
9. Malignant peripheral nerve sheath tumor<sup>77-82</sup>
10. Malignant vascular tissue tumors<sup>83-93</sup>
11. Rhabdomyosarcoma<sup>94-98</sup>
12. Leiomyosarcoma<sup>99-113</sup>
13. Liposarcoma<sup>114-126</sup>
14. Osteosarcoma<sup>127-134</sup>
15. Ewing sarcoma family of tumors<sup>135-145</sup>
16. Synovial sarcoma<sup>146-154</sup>
17. Fibrosarcoma<sup>155-161</sup>
18. Chondrosarcoma<sup>162-169</sup>
19. Undifferentiated pleomorphic sarcoma<sup>170-175</sup>
20. Carcinosarcoma<sup>176-182</sup>
21. Rhabdomyoma<sup>183</sup>
22. Follicular dendritic cell sarcoma<sup>184-186</sup>
23. Malignant triton tumor<sup>187,188</sup>
24. Malignant glomus tumor<sup>189,190</sup>
25. Kaposi sarcoma<sup>191-194</sup>
26. Alveolar soft part sarcoma<sup>195</sup>
27. Ameloblastic fibrosarcoma<sup>196</sup>
28. Malignant mesenchymoma<sup>197</sup>

## II. Reference list:

1. Haegert DG, Wang NS, Farrer PA, Seemayer TA, Thelmo W. Non-chromaffin Paragangliomatosis Manifesting as a Cold Thyroid Nodule. *American Journal of Clinical Pathology* 1974; **61**(4): 561-70.
2. LaGuette J, Matias-Guiu X, Rosai J. Thyroid paraganglioma: a clinicopathologic and immunohistochemical study of three cases. *The American journal of surgical pathology* 1997; **21**(7): 748-53.
3. Hughes JH, El-Mofty S, Sessions D, Liapis H. Primary intrathyroidal paraganglioma with metachronous carotid body tumor: report of a case and review of the literature. *Pathology-Research and Practice* 1997; **193**(11-12): 791-6.
4. Skiadas PK, Kakavoulis TN, Gikonti IJ. Normalisation of blood pressure and heart rate after excision of a thyroid paraganglioma. *The European journal of surgery* 2001; **167**(5): 392-4.
5. Foppiani L, Marugo A, Del Monte P, et al. Thyroid paraganglioma manifesting as hot toxic nodule. *Journal of endocrinological investigation* 2005; **28**(7): 479-80.
6. Kantorovich V, King KS, Pacak K. SDH-related pheochromocytoma and paraganglioma. *Best practice & research Clinical endocrinology & metabolism* 2010; **24**(3): 415-24.
7. Phitayakorn R, Faquin W, Wei N, Barbesino G, Stephen AE. Thyroid-associated paragangliomas. *Thyroid* 2011; **21**(7): 725-33.
8. King KS, Chen CC, Alexopoulos DK, et al. Functional imaging of SDHx-related head and neck paragangliomas: comparison of 18F-fluorodihydroxyphenylalanine, 18F-fluorodopamine, 18F-fluoro-2-deoxy-D-glucose PET, 123I-metaiodobenzylguanidine scintigraphy, and 111In-pentetreotide scintigraphy. *The Journal of Clinical Endocrinology & Metabolism* 2011; **96**(9): 2779-85.
9. Armstrong MJ, Chiosea SI, Carty SE, Hodak SP, Yip L. Thyroid paragangliomas are locally aggressive. *Thyroid* 2012; **22**(1): 88-93.
10. Costinean S, Balatti V, Bottoni A, Old M, Croce C, Wakely Jr PE. Primary intrathyroidal paraganglioma: histopathology and novel molecular alterations. *Human pathology* 2012; **43**(12): 2371-5.
11. Filipović A, Vučković L, Pejakov L. Paraganglioma of the thyroid gland: a case report. *Vojnosanitetski pregled* 2014; **71**(9): 875-8.
12. Lee SM, Policarpio-Nicolas MLC. Thyroid paraganglioma. *Archives of pathology & laboratory medicine* 2015; **139**(8): 1062-7.
13. Von Dobschuetz E, Leijon H, Schalin-Jäntti C, et al. A registry-based study of thyroid paraganglioma: histological and genetic characteristics. *Endocrine-related cancer* 2015; **22**(2): 191-204.
14. Zhang W, Policarpio-Nicolas MLC. Aspiration cytology of primary thyroid paraganglioma. *Diagnostic cytopathology* 2015; **43**(10): 838-43.
15. Reznick D, Scharpf J, Doshi K, et al. Malignant primary paraganglioma of the thyroid gland: the first reported case. *AACE Clinical Case Reports* 2016; **2**(1): e70-e5.
16. Gill M, Roychoudhury AK, Thukral S, Gupta A, Bansal N. Primary Paraganglioma of the Thyroid Gland-A Rare Case Report. *Journal of Clinical & Diagnostic Research* 2017; **11**(12).
17. Dong Y-j, Zhang Z-w, Wang Z, Wang X-y, Tian Z-z, Zhang X-s. Primary melanotic paraganglioma of thyroid gland: Report of a rare case with clinicopathologic and immunohistochemical analysis and a literature review. *Clinical Medicine Insights: Pathology* 2017; **10**: 1179555716684670.
18. Nguyen NA, Peter I, Levay B, Andi J, Polgar C, Takacs-Nagy Z. Case Report Thyroid gland paraganglioma: report of a case and review of the literature. *Int J Clin Exp Med* 2017; **10**(12): 16703-8.
19. Sangtian J, Evasovich MR, Harindhanavudhi T. A Rarity in a Common Disease: Thyroid Paraganglioma. *The American journal of medicine* 2017; **130**(4): e133-e5.
20. Pelizzo MR, Conti C, Pennelli G, et al. Thyroid Paraganglioma. *American journal of clinical oncology* 2018; **41**(4): 416-23.
21. Kiriakopoulos A, Linos D. Thyroid paraganglioma: a case series of a rare head and neck tumor. *Journal of surgical case reports* 2018; **2018**(8): rjy184.
22. Mishra P, Padhi S, Behera G. Thyroid paraganglioma: A case-based systematic review of literature. 2020.
23. Goldstein J, Tovi F, Sidi J. Primary Schwannoma of the thyroid gland. *International surgery* 1982; **67**(4 Suppl): 433-4.
24. Cohen LM, Schwartz AM, Rockoff SD. Benign schwannomas: pathologic basis for CT inhomogeneities. *American Journal of Roentgenology* 1986; **147**(1): 141-3.
25. Mikosch P, Gallowitsch H, Kresnik E, Lind P. Schwannoma of the neck simulating a thyroid nodule. *Thyroid* 1997; **7**(3): 449-51.
26. Sugita R, Nomura T, Yuda F. Primary schwannoma of the thyroid gland: CT findings. *AJR American journal of roentgenology* 1998; **171**(2): 528-9.
27. Jayaram G. Neurilemmoma (schwannoma) of the thyroid diagnosed by fine needle aspiration cytology. *Acta Cytol* 1999; **43**: 743-4.
28. De Paoli F, Giugliano G, Casadio C, Tredici P, Bruschini R, De Fiori E. Schwannoma of thyroid bed. A case report and considerations on interdisciplinary collaboration. *Acta Otorhinolaryngologica Italica* 2005; **25**(4): 250.
29. An J, Oh YL, Shin JH, Jeong H-S. Primary schwannoma of the thyroid gland: a case report. *Acta cytologica* 2010; **54**(5 Suppl): 857-62.
30. Subramaniam V, Adarsha T, Khandige S. Schwannoma of the thyroid gland—a case report. *Jurnalul de Chirurgie, Lasi* 2010; **6**(4): 535-8.
31. Dhar H, Dabholkar JP, Kandalkar BM, Ghodke R. Primary thyroid schwannoma masquerading as a thyroid nodule. *Journal of surgical case reports* 2014; **2014**(9).
32. Agrawal P, Garg N, Jain P. Primary schwannoma of thyroid gland in an adolescent male: a rare case-report with review of literature. *Annals of Pathology and Laboratory Medicine* 2016; **3**(1): C1-5.
33. Agnihotri S, Jalali S, Wilson MR, et al. The genomic landscape of schwannoma. *Nature genetics* 2016; **48**(11): 1339.
34. Wang D-Z, Liu P, Yao L, et al. Aberrant expression of thyroid transcription factor-1 in schwannomas. *Human pathology* 2018; **71**: 84-90.
35. Capelli A, Guernelli L, Bertoni F, Fuga G. Neurofibroma of the thyroid (report of a case). *Archivio di chirurgia toracica e cardiovascolare* 1975; **32**(1-2): 23-7.
36. Anagnostouli M, Piperinos G, Yapijakis C, et al. Thyroid gland neurofibroma in a NF1 patient. *Acta neurologica scandinavica* 2002; **106**(1): 58-61.
37. Severo MD, Rosa VDD, De Carli DM, Beck MdO, Danbermam MF. Neurofibroma of thyroid in a patient with neurofibromatosis type 1. *Arquivos Brasileiros de Endocrinologia & Metabologia* 2008; **52**(1): 131-3.
38. Gaud U, Shukla M, Kumar M, Pandey M. Isolated intrathyroidal neurofibroma. *Otolaryngology—Head and Neck Surgery* 2009; **141**(2): 300-1.
39. Doulias T, Papaziogas B, Rosser J, Koutelidakis I. Thyroid neurofibroma in a female patient with neurofibromatosis type I: report of a case. *BMJ case reports* 2013; **2013**: bcr2012008216.
40. Sasmal PK, Dash K, Mohanty R, Devi K. Isolated neurofibroma of the Thyroid Gland. *Archives of International Surgery* 2014; **4**(1): 44.

41. Schrader K, Nelson T, De Luca A, Huntsman D, McGillivray B. Multiple granular cell tumors are an associated feature of LEOPARD syndrome caused by mutation in PTPN11. *Clinical genetics* 2009; **75**(2): 185-9.
42. Pareja F, Brandes AH, Basili T, et al. Loss-of-function mutations in ATP6AP1 and ATP6AP2 in granular cell tumors. *Nature communications* 2018; **9**(1): 1-13.
43. Almaghrabi M, Almaghrabi H, Al-Maghrabi H. Granular cell tumor of thyroid: Challenging pitfalls and mimickers in diagnosis. *Journal of Microscopy and Ultrastructure* 2020; **8**(1): 1.
44. Pickleman JR, Lee JF, Straus II FH, Paloyan E. Thyroid hemangioma. *The American Journal of Surgery* 1975; **129**(3): 331-3.
45. Kumar R, Gupta R, Khullar S, MALHOTRA A. Thyroid hemangioma: a case report with a review of the literature. *Clinical nuclear medicine* 2000; **25**(10): 769-71.
46. Rios A, Rodriguez J, Martinez E, Parrilla P. Cavernous hemangioma of the thyroid. *Thyroid* 2001; **11**(3): 279-80.
47. Lee J, Yun JS, Nam KH, Chung WY, Park CS. Huge cavernous hemangioma of the thyroid gland. *Thyroid* 2007; **17**(4): 375-6.
48. Maciel LMZ, Gomes PM, Magalhães PKR, Filho FVM, Conti-Freitas LC. A Giant Primary Hemangioma of the Thyroid Gland. *The Journal of Clinical Endocrinology & Metabolism* 2011; **96**(6): 1623-4.
49. Miao J, Chen S, Li Y, Fu L, Li H. A primary cavernous hemangioma of the thyroid gland: A case report and literature review. *Medicine* 2017; **96**(49).
50. Hendrick JW. Leiomyoma of thyroid gland: Report of case. *Surgery* 1957; **42**(3): 597-9.
51. Andrion A, Bellis D, Delsedime L, Bussolati G, Mazzucco G. Leiomyoma and neurilemoma: report of two unusual non-epithelial tumours of the thyroid gland. *Virchows Archiv A* 1988; **413**(4): 367-72.
52. A. BIANKIN S, R. CACHIA A. Leiomyoma of the thyroid gland. *Pathology* 1999; **31**(1): 64-6.
53. Erkiç S, Erkiç A, Bayazit YA. Primary leiomyoma of the thyroid gland. *The Journal of Laryngology & Otology* 2003; **117**(10): 832-4.
54. Mohammed AZ, Edino ST, Umar AB. Leiomyoma of the thyroid gland with psammoma bodies. *Nigerian medical journal: journal of the Nigeria Medical Association* 2015; **56**(1): 71.
55. Panagopoulos I, Gorunova L, Brunetti M, et al. Genetic heterogeneity in leiomyomas of deep soft tissue. *Oncotarget* 2017; **8**(30): 48769.
56. Zhang Y, Tang H, Hu H, Yong X. A Rare Primary Tumor of the Thyroid Gland: A New Case of Leiomyoma and Literature Review. *Clinical Medicine Insights: Oncology* 2018; **12**: 1179554918813535.
57. Schröder S, Böcker W, Hüsselmann H, Dralle H. Adenolipoma (thyrolipoma) of the thyroid gland report of two cases and review of literature. *Virchows Archiv A* 1984; **404**(1): 99-103.
58. Kitagawa W, Kameyama K, Tamai S, et al. Adenolipoma of the thyroid gland: report of a case. *Surgery today* 2004; **34**(7): 593-6.
59. Daboin KP, Ochoa-Perez V, Luna MA. Adenolipomas of the head and neck: analysis of 6 cases. *Annals of diagnostic pathology* 2006; **10**(2): 72-6.
60. Kim HS, Yun KJ. Adenolipoma of the thyroid gland: Report of a case with diagnosis by fine-needle aspiration cytology. *Diagnostic cytopathology* 2008; **36**(4): 253-6.
61. Gupta A, Mathur S, Batra C, Gupta A. Adenolipoma of the thyroid gland. *Indian Journal of Pathology and Microbiology* 2008; **51**(4): 521.
62. Fitzpatrick N, Malik P, Hinton-Bayre A, Lewis R. Airway obstruction secondary to large thyroid adenolipoma. *BMJ case reports* 2014; **2014**: bcr2014204793.
63. Pennisi M, Conti A, Farina R, et al. Thyroid adenolipoma: A case report. *Journal of ultrasound* 2018; **21**(2): 165-8.
64. Rodriguez I, Ayala E, Caballero C, et al. Solitary fibrous tumor of the thyroid gland: report of seven cases. *The American journal of surgical pathology* 2001; **25**(11): 1424-8.
65. Cameselle-Teijeiro J, Manuel JL, Villanueva J, Gil-Gil P, Sobrinho-Simoes M. Lipomatous haemangiopericytoma (adipocytic variant of solitary fibrous tumour) of the thyroid. *Histopathology* 2003; **43**(4): 406-8.
66. Gengler C, Guillou L. Solitary fibrous tumour and haemangiopericytoma: evolution of a concept. *Histopathology* 2006; **48**(1): 63-74.
67. Papi G, Corrado S, Uberti ED, Roti E. Solitary fibrous tumor of the thyroid gland. *Thyroid* 2007; **17**(2): 119-26.
68. Farrag TY, Michelli S, Tufano RP. Solitary fibrous tumor of the thyroid gland. *The Laryngoscope* 2009; **119**(12): 2306-8.
69. Ning S, Song X, Xiang L, Chen Y, Cheng Y, Chen H. Malignant solitary fibrous tumor of the thyroid gland: report of a case and review of the literature. *Diagnostic cytopathology* 2011; **39**(9): 694-9.
70. Fletcher C, Bridge J, Lee J. Extrapleural solitary fibrous tumour. World Health Organisation Classification of Tumours of Soft Tissue and Bone: IARC Press, Lyon; 2013: 80-2.
71. Alves Filho W, Mahmoud RRdGL, Ramos DM, et al. Malignant solitary fibrous tumor of the thyroid: a case-report and review of the literature. *Arquivos Brasileiros de Endocrinologia & Metabologia* 2014; **58**(4): 402-6.
72. Mizuuchi Y, Yamamoto H, Nakamura K, et al. Solitary fibrous tumor of the thyroid gland. *Medical molecular morphology* 2014; **47**(2): 117-22.
73. Doyle LA, Vivero M, Fletcher CD, Mertens F, Hornick JL. Nuclear expression of STAT6 distinguishes solitary fibrous tumor from histologic mimics. *Modern Pathology* 2014; **27**(3): 390.
74. Gholami S, Cassidy MR, Kirane A, et al. Size and location are the most important risk factors for malignant behavior in resected solitary fibrous tumors. *Annals of surgical oncology* 2017; **24**(13): 3865-71.
75. Ghasemi-rad M, Wang KY, Jain S, Lincoln CM. Solitary fibrous tumor of thyroid: a case report with review of literature. *Clinical imaging* 2019; **53**: 105-7.
76. Thompson LD, Wei C, Rooper LM, Lau SK. Thyroid Gland Solitary Fibrous Tumor: Report of 3 Cases and a Comprehensive Review of the Literature. *Head and neck pathology* 2019: 1-9.
77. Thompson LD, Wenig BM, Adair CF, Heffess CS. Peripheral nerve sheath tumors of the thyroid gland: a series of four cases and a review of the literature. *Endocrine pathology* 1996; **7**(4): 309-18.
78. Pallares J, Perez-Ruiz L, Ros S, et al. Malignant peripheral nerve sheath tumor of the thyroid: A clinicopathological and ultrastructural study of one case. *Endocrine pathology* 2004; **15**(2): 167-74.
79. Gupta G, Maniker A. Malignant peripheral nerve sheath tumors. *Neurosurgical focus* 2007; **22**(6): 1-8.
80. Tang T, Li C, Chen J, Yang G, Liao Q, Wang Z. Primary malignant peripheral nerve sheath tumor of the thyroid--an extremely rare case report of thyroid carcinoma. 2017.
81. Brohl AS, Kahen E, Yoder SJ, Teer JK, Reed DR. The genomic landscape of malignant peripheral nerve sheath tumors: diverse drivers of Ras pathway activation. *Scientific reports* 2017; **7**(1): 14992.
82. Al-Ghamdi S, Fageeh N, Dewan M. Malignant schwannoma of the thyroid gland. *Otolaryngology—Head and Neck Surgery* 2000; **122**(1): 143-4.
83. Goh SGN, Chuah KL, Goh HKC, Chen YYC. Two cases of epithelioid angiosarcoma involving the thyroid and a brief review of non-Alpine epithelioid angiosarcoma of the thyroid. *Archives of pathology & laboratory medicine* 2003; **127**(2): e70-e3.
84. Kalitova P, Plzak J, Kodet R, Astl J. Angiosarcoma of the thyroid. *European Archives of Oto-Rhino-Laryngology* 2009; **266**(6): 903-5.



85. Collini P, Barisella M, Renne SL, et al. Epithelioid angiosarcoma of the thyroid gland without distant metastases at diagnosis: report of six cases with a long follow-up. *Virchows Archiv* 2016; **469**(2): 223-32.
86. Moon SY, Park HS, Woo JY, et al. Primary thyroid angiosarcoma with tracheal invasion. *Internal Medicine* 2016; **55**(9): 1165-9.
87. De Felice F, Moscatelli E, Orelli S, Bulzonetti N, Musio D, Tombolini V. Primary thyroid angiosarcoma: A systematic review. *Oral oncology* 2018; **82**: 48-52.
88. Nechifor-Boilă A, Decaussin-Petrucci M, Varga-Ilyés A, Chinezu L, Carașca C, Borda A. Angioinvasion as a factor for predicting aggressive outcome in primary thyroid angiosarcoma: three case reports and literature review. *Polish Journal of Pathology* 2018; **69**(1): 53-61.
89. Marina M, Corcione L, Serra MF, Ferri T, Silini EM, Ceresini G. Primary Epithelioid Angiosarcoma of the Thyroid in a Patient Occupationally Exposed to Radiations. *Frontiers in endocrinology* 2018; **9**.
90. Askaoui S, Lmghari G, Rafi S, El Ansari N. Thyroid angiosarcoma: in the light of a case. 21st European Congress of Endocrinology; 2019: BioScientifica; 2019.
91. Bala NM, Aragues JM, Guerra S, Roque R, Madureira R, Valadas C. Primary thyroid angiosarcoma—a case report. 21st European Congress of Endocrinology; 2019: BioScientifica; 2019.
92. Rhomberg W, Boehler F, Eiter H, Fritzsche H, Breitfellner G. Treatment options for malignant hemangioendotheliomas of the thyroid. *International Journal of Radiation Oncology\* Biology\* Physics* 2004; **60**(2): 401-5.
93. Antonescu C. Malignant vascular tumors—an update. *Modern Pathology* 2014; **27**(S1): S30.
94. Furze AD, Lehman DA, Roy S. Rhabdomyosarcoma presenting as an anterior neck mass and possible thyroid malignancy in a seven-month-old. *International journal of pediatric otorhinolaryngology* 2005; **69**(2): 267-70.
95. Dutta M, Chatterjee I, Roy S, Gure PK. Primary embryonal rhabdomyosarcoma of the anterior neck and thyroid: report of a new case with review of the literature. *The Laryngoscope* 2013; **123**(8): 2072-6.
96. Shern JF, Chen L, Chmielecki J, et al. Comprehensive genomic analysis of rhabdomyosarcoma reveals a landscape of alterations affecting a common genetic axis in fusion-positive and fusion-negative tumors. *Cancer discovery* 2014; **4**(2): 216-31.
97. Ozaslan E, Berk V, Baldane S, et al. Primary pleomorphic rhabdomyosarcoma of thyroid gland in an adult patient: a case report. *The Eurasian journal of medicine* 2016; **48**(1): 69.
98. Febrero B, Oviedo I, Ríos A, Rodríguez J. Primary rhabdomyosarcoma of the thyroid in an adult with auricular thrombosis. *European annals of otorhinolaryngology, head and neck diseases* 2017; **134**(1): 49-51.
99. Ozaki O, Sugino K, Mimura T, Ito K, Tamai S, Hosoda Y. Primary leiomyosarcoma of the thyroid gland. *Surgery today* 1997; **27**(2): 177-80.
100. Tulbah A, Al-Dayel F, Fawaz I, Rosai J. Epstein-Barr virus-associated leiomyosarcoma of the thyroid in a child with congenital immunodeficiency: a case report. *The American journal of surgical pathology* 1999; **23**(4): 473-6.
101. Takayama F, Takashima S, Matsuba H, Kobayashi S, Ito N, Sone S. MR imaging of primary leiomyosarcoma of the thyroid gland. *European journal of radiology* 2001; **37**(1): 36-41.
102. Day A-S, Lou P-J, Lin W-C, Chou C-C. Over-expression of c-kit in a primary leiomyosarcoma of the thyroid gland. *European archives of oto-rhino-laryngology* 2007; **264**(6): 705-8.
103. Just P-A, Guillevin R, Capron F, et al. An unusual clinical presentation of a rare tumor of the thyroid gland: report on one case of leiomyosarcoma and review of literature. *Annals of diagnostic pathology* 2008; **12**(1): 50-6.
104. Amal B, El Fatemi H, Souaf I, Moumna K, Affaf A. A rare primary tumor of the thyroid gland: report a new case of leiomyosarcoma and literature review. *Diagnostic pathology* 2013; **8**(1): 36.
105. Mouaqit O, Belkacem Z, Ifrine L, Mohsine R, Belkouchi A. A rare tumor of the thyroid gland: report on one case of leiomyosarcoma and review of literature. *Updates in surgery* 2014; **66**(2): 165-7.
106. Zou ZY, Ning N, Li SY, Li J, Du XH, Li R. Primary thyroid leiomyosarcoma: A case report and literature review. *Oncology letters* 2016; **11**(6): 3982-6.
107. Şahin Mİ, Vural A, Yüce İ, Çağlı S, Deniz K, Güney E. Thyroid leiomyosarcoma: presentation of two cases and review of the literature. *Brazilian journal of otorhinolaryngology* 2016; **82**(6): 715-21.
108. Ayadi M, Gabsi A, Meddeb K, et al. Primary leiomyosarcoma of thyroid gland: the youngest case. *The Pan African medical journal* 2017; **26**.
109. Canu G, Bulla J, Lai M, et al. Primary thyroid leiomyosarcoma: a case report and review of the literature. *Il Giornale di chirurgia* 2018; **39**(1): 51.
110. Kushnir I, Soyfer V, Merimsky O. A Case Report of Metastatic Primary Thyroid Leiomyosarcoma Treated with Pazopanib. *The Israel Medical Association journal: IMAJ* 2018; **20**(2): 125.
111. Chudasama P, Mughal SS, Sanders MA, et al. Integrative genomic and transcriptomic analysis of leiomyosarcoma. *Nature communications* 2018; **9**(1): 144.
112. Wei J, Yang J, Liang W, Xu C, Wen Y. Clinicopathological features of primary thyroid leiomyosarcoma without Epstein-Barr virus infection: A case report. *Oncology letters* 2019; **17**(1): 281-7.
113. Vujosevic S, Krnjevic D, Bogojevic M, et al. Primary leiomyosarcoma of the thyroid gland with prior malignancy and radiotherapy: A case report and review of literature. *World journal of clinical cases* 2019; **7**(4): 473.
114. Nielsen VT, Knudsen N, Holm IE. Liposarcoma of the thyroid gland. *Tumori Journal* 1986; **72**(5): 499-502.
115. Andrion A, Gaglio A, Dogliani N, Bosco E, Mazzucco G. Liposarcoma of the Thyroid Gland Fine-Needle Aspiration Cytology, Immunohistology, and Ultrastructure. *American journal of clinical pathology* 1991; **95**(5): 675-9.
116. Awad WI, Evans PHR, Nicholson AG, Goldstraw P. Liposarcoma of the thyroid gland mimicking retrosternal goiter. *The Annals of thoracic surgery* 2003; **75**(2): 566-8.
117. Mitra A, Fisher C, Rhys-Evans P, Harmer C. Liposarcoma of the thyroid. *Sarcoma* 2004; **8**(2-3): 91-6.
118. Kilic M, Keskek M, Albayrak L, Ertan T, Gocmen E, Koc M. Liposarcoma of the thyroid gland: a case report. *Acta chirurgica Belgica* 2007; **107**(1): 73-4.
119. Huang G, Li Y, Hu Z. Primary myxoid liposarcoma of the thyroid gland. *Journal of clinical pathology* 2009; **62**(11): 1037-8.
120. Gritli S, Khamassi K, Lachkhem A, et al. Head and neck liposarcomas: a 32 years experience. *Auris Nasus Larynx* 2010; **37**(3): 347-51.
121. Kumar V, Raj A, Rathore P. Liposarcoma of thyroid gland: a review of the gained experience. *Indian journal of cancer* 2014; **51**(4).
122. Guarda V, Pickhard A, Boxberg M, Specht K, Buchberger AMS. Liposarcoma of the Thyroid: A Case Report with a Review of the Literature. *European thyroid journal* 2018; **7**(2): 102-8.
123. Palla AR, Bollig CA, Jorgensen JB. Well-Differentiated Liposarcoma Localized to the Thyroid Gland. *European thyroid journal* 2018; **7**(4): 179-83.

124. Kishimoto Y, Ohno Kishimoto A, Yamada Y, et al. Dedifferentiated liposarcoma of the thyroid gland: A case report. *Molecular and clinical oncology* 2019; **11**(3): 219-24.
125. Demicco EG. Molecular updates in adipocytic neoplasms. *Seminars in diagnostic pathology*; 2019: Elsevier; 2019.
126. Creytens D. A contemporary review of myxoid adipocytic tumors. *Seminars in diagnostic pathology*; 2019: Elsevier; 2019.
127. Trowell J, Arkell D. Osteosarcoma of the thyroid gland. *The Journal of pathology* 1976; **119**(2): 123-7.
128. Syrjänen K. Fine needle aspiration cytology of the thyroid osteosarcoma. *Journal of cancer research and clinical oncology* 1980; **96**(3): 319-23.
129. Nitzsche EU, Seeger LL, Klosa B, Freudenberg N, Moser EA. PRIMARY OSTEOSARCOMA OF THE THYROID-GLAND. 1992.
130. Tong GX, Hamele-Bena D, Liu JC, Horst B, Remotti F. Fine-needle aspiration biopsy of primary osteosarcoma of the thyroid: Report of a case and review of the literature. *Diagnostic cytopathology* 2008; **36**(8): 589-94.
131. Makis W, Novales-Diaz J-A, Hickeson M. Primary thyroid osteosarcoma: staging and evaluation of response to therapy with F-18 FDG PET-CT. *Clinical nuclear medicine* 2010; **35**(7): 517-20.
132. Zembala-Nożyńska E, Lange D. Primary osteosarcoma of the thyroid gland—a case report. *Contemporary oncology* 2013; **17**(1): 97.
133. Kansara M, Teng MW, Smyth MJ, Thomas DM. Translational biology of osteosarcoma. *Nature Reviews Cancer* 2014; **14**(11): 722.
134. Gianferante DM, Mirabello L, Savage SA. Germline and somatic genetics of osteosarcoma—connecting aetiology, biology and therapy. *Nature Reviews Endocrinology* 2017; **13**(8): 480.
135. Grier HE, Krailo MD, Tarbell NJ, et al. Addition of ifosfamide and etoposide to standard chemotherapy for Ewing's sarcoma and primitive neuroectodermal tumor of bone. *New England Journal of Medicine* 2003; **348**(8): 694-701.
136. Tirode F, Laud-Duval K, Prieur A, Delorme B, Charbord P, Delattre O. Mesenchymal stem cell features of Ewing tumors. *Cancer cell* 2007; **11**(5): 421-9.
137. Adapa P, Chung T-W, Popek EJ, Hunter JV. Extraosseous Ewing sarcoma of the thyroid gland. *Pediatric radiology* 2009; **39**(12): 1365.
138. Maldí E, Monga G, Rossi D, Tosoni A, Mezzapelle R, Boldorini R. Extra-osseous Ewing sarcoma of the thyroid gland mimicking lymphoma recurrence: a case report. *Pathology-Research and Practice* 2012; **208**(6): 356-9.
139. Chan JM, Bilodeau E, Celin S, Nikiforov Y, Johnson JT. Ewing sarcoma of the thyroid: report of 2 cases and review of the literature. *Head & neck* 2013; **35**(11): E346-E50.
140. Chirilă M, Muresan M, Ciuleanu E, Cosgarea M. Extraosseous Ewing sarcoma and peripheral primitive neuroectodermal tumor of the thyroid gland: Case report and review. *Ear, Nose & Throat Journal* 2013; **92**(4): E3-E6.
141. Bishop JA, Alaggio R, Zhang L, Seethala RR, Antonescu CR. Adamantinoma-like Ewing family tumors of the head and neck: a pitfall in the differential diagnosis of basaloid and myoepithelial carcinomas. *The American journal of surgical pathology* 2015; **39**(9): 1267.
142. Tu J, Huo Z, Gingold J, Zhao R, Shen J, Lee D-F. The histogenesis of Ewing sarcoma. *Cancer reports and reviews* 2017; **1**(2).
143. Kabata P, Kaniuka-Jakubowska S, Kabata W, et al. primary ewing sarcoma of the thyroid—eight Cases in a Decade: a Case Report and Literature Review. *Frontiers in endocrinology* 2017; **8**: 257.
144. Ongkeko M, Zeck J, de Brito P. Molecular testing uncovers an Adamantinoma-like Ewing family of tumors in the thyroid: case report and review of literature. *AJSP: Reviews & Reports* 2018; **23**(1): 8-12.
145. Morlote D, Harada S, Lindeman B, Stevens TM. Adamantinoma-Like Ewing Sarcoma of the Thyroid: A Case Report and Review of the Literature. *Head and neck pathology* 2019: 1-6.
146. Kikuchi I, Anbo J, Nakamura S-i, et al. Synovial sarcoma of the thyroid. Report of a case with aspiration cytology findings and gene analysis. *Acta cytologica* 2003; **47**(3): 495-500.
147. Ghafouri A, Anbara T, Mir A, Lashkari M, Nazari M. Thyroid synovial sarcoma: a case report. *Acta Medica Iranica* 2013: 69-72.
148. Ushiro K, Fujimoto Y, Nakamura H, et al. A Case of Synovial Sarcoma of the Thyroid Gland Masquerading as Anaplastic Thyroid Carcinoma. *Practica oto-rhino-laryngologica Suppl* 2017; **148**: 98-9.
149. Hassouna A, Salama A. Synovial Sarcoma of Thyroid Gland: Case Report and Review of Literature. *Glob J Medical Clin Case Rep* 2017; **4**(2): 051-2.
150. Park C-S, Kim Y, Jeong E-H, Kim N-I, Choi Y-D. Cytologic features of primary monophasic synovial sarcoma of the thyroid gland. *CytoJournal* 2017; **14**.
151. Nicola M, Onorati M, Bertola G, Collini P, Fasci A, Di Nuovo F. Primary thyroid biphasic synovial sarcoma and synchronous papillary carcinoma: report of a remarkable case. *Pathologica* 2018; **110**(2): 106-10.
152. Yadav D, Agarwal S, Sharma A, et al. Synovial sarcoma masquerading as medullary thyroid carcinoma. *Cytopathology* 2018; **29**(5): 468-70.
153. Owen C, Constantinidou A, Miah AB, et al. Synovial Sarcoma of the Thyroid Gland, Diagnostic Pitfalls and Clinical Management. *Anticancer research* 2018; **38**(9): 5275-82.
154. Iftikhar H, Akhtar S, Uddin N. Concurrent Papillary Thyroid Carcinoma and Synovial Carcinoma of the Neck in an Adult Male. *Iranian journal of otorhinolaryngology* 2019; **31**(102): 69.
155. Shin WY, Aftalion B, Hotchkiss E, Schenkman R, Berkman J. Ultrastructure of a primary fibrosarcoma of the human thyroid gland. *Cancer* 1979; **44**(2): 584-91.
156. Tamada A, Makimoto K, Tasaka Y, Nakamoto Y, Iwasaki H, Yamabe H. Radiation-induced fibrosarcoma of the thyroid. *The Journal of Laryngology & Otology* 1984; **98**(10): 1063-6.
157. Wygoda M, Osin P, Sichel J-Y, Dano I, Eudan J. Fibrosarcoma of the thyroid in a man exposed to fallout from the Chernobyl accident. *Annals of Otology, Rhinology & Laryngology* 1996; **105**(10): 832-4.
158. Titi S, Sycz K, Umiński M. Primary fibrosarcoma of the thyroid gland—a case report. *Pol J Pathol* 2007; **58**(1): 59-62.
159. Janczak D, Chabowski M, Pawelczyk J, Jelen M, Szydelko T. A giant primary thyroid fibrosarcoma in an octogenarian. *Chirurgia* 2013; **108**(4): 568-70.
160. Augsburger D, Nelson PJ, Kalinski T, et al. Current diagnostics and treatment of fibrosarcoma—perspectives for future therapeutic targets and strategies. *Oncotarget* 2017; **8**(61): 104638.
161. Arora K. Fibrosarcoma of soft tissue - adult PathologyOutlines.com website. <http://www.pathologyoutlines.com/topic/softtissuefibrosarcoma.html>. 21 March 2019 2019 (accessed June 6th 2019).
162. Jasonni V. [Primary chondrosarcoma of the thyroid]. *Archivio italiano di anatomia e istologia patologica* 1968; **42**(4): 328-58.
163. Tseleni-Balafouta S, Arvanitis D, Kakaviatos N, Paraskevskou H. Primary myxoid chondrosarcoma of the thyroid gland. *Archives of pathology & laboratory medicine* 1988; **112**(1): 94-6.
164. Haeri H, Torbaghan FAASS. A case report of well differentiated chondrosarcoma of thyroid gland. *Acta Medica Iranica* 1999: 249-51.
165. Abbas M, Ajrawi T, Tungekar M. Mesenchymal chondrosarcoma of the thyroid—a rare tumour at an unusual site: Case report. *Apmis* 2004; **112**(6): 384-9.

166. Amary MF, Bacsi K, Maggiani F, et al. IDH1 and IDH2 mutations are frequent events in central chondrosarcoma and central and periosteal chondromas but not in other mesenchymal tumours. *The Journal of pathology* 2011; **224**(3): 334-43.
167. Wang L, Motoi T, Khanin R, et al. Identification of a novel, recurrent HEY1-NCOA2 fusion in mesenchymal chondrosarcoma based on a genome-wide screen of exon-level expression data. *Genes, Chromosomes and Cancer* 2012; **51**(2): 127-39.
168. Tarpey PS, Behjati S, Cooke SL, et al. Frequent mutation of the major cartilage collagen gene COL2A1 in chondrosarcoma. *Nature genetics* 2013; **45**(8): 923.
169. Agaram NP, Zhang L, Sung Y-S, Singer S, Antonescu CR. Extraskelletal myxoid chondrosarcoma with non-EWSR1-NR4A3 variant fusions correlate with rhabdoid phenotype and high-grade morphology. *Human pathology* 2014; **45**(5): 1084-91.
170. Zeng Q, Tang P, Xu Z, Qi Y, Wu X, Liu W. Primary malignant fibrous histiocytoma of the thyroid. *European Journal of Surgical Oncology (EJSO)* 2009; **35**(6): 649-53.
171. Wang Y, Huang L, Lv H, Huang Y, Li D. Primary Malignant Fibrous Histiocytoma of the Thyroid: Two Case Reports and Review of the Literature. *Journal of Ultrasound in Medicine* 2017; **36**(3): 665-9.
172. Chen Q, Huang Q, Yan J-x, Li C, Lang J-y. Primary undifferentiated pleomorphic sarcoma of the thyroid: A case report and review of the literature. *Medicine* 2018; **97**(7).
173. Lazar AJ, McLellan MD, Bailey MH, et al. Comprehensive and integrated genomic characterization of adult soft tissue sarcomas. *Cell* 2017; **171**(4): 950-65.
174. Kouassi Y, Tanon-Anoh M, Doukouré B, et al. Thyroid localization of myxofibrosarcoma: first case in Africa. *Medecine tropicale: revue du Corps de sante colonial* 2010; **70**(1): 70-2.
175. Darouassi Y, Attifi H, Zalagh M, Rharrassi I, Benariba F. Myxofibrosarcoma of the thyroid gland. *European annals of otorhinolaryngology, head and neck diseases* 2014; **131**(6): 385-7.
176. Al-Sobhi SS, Novosolov F, Sabançi Ü, Epstein HD, Greenspan FS, Clark OH. Management of thyroid carcinosarcoma. *Surgery* 1997; **122**(3): 548-52.
177. Naqiyah I, Zulkarnaen A, Rohaizak M, Das S. Carcinosarcoma of the thyroid: a case report. *Hippokratia* 2010; **14**(2): 141.
178. Agrawal M, Uppin SG, Challa S, Prayaga AK. Carcinosarcoma thyroid: An unusual morphology with a review of the literature. *South Asian journal of cancer* 2013; **2**(4): 226.
179. Ekici MF, Kocak C, Bayhan Z, et al. Carcinosarcoma of the Thyroid Gland. *Case reports in surgery* 2015; **2015**.
180. Rasheed R, Saeed N, Naqvi A, Rasheed S, Gillani JA. Sporadic carcinosarcoma of thyroid gland resistant to chemotherapy: a case report. *J Endocrinol Thyroid Res* 2017; **1**: 1-3.
181. Yang J, Sarita-Reyes C, Kindelberger D, Zhao Q. A rare malignant thyroid carcinosarcoma with aggressive behavior and DICER1 gene mutation: a case report with literature review. *Thyroid research* 2018; **11**(1): 11.
182. Growdon WB, Roussel BN, Scialabba VL, et al. Tissue-specific signatures of activating PIK3CA and RAS mutations in carcinosarcomas of gynecologic origin. *Gynecologic oncology* 2011; **121**(1): 212-7.
183. Domanski HA, Dawiskiba S. Adult rhabdomyoma in fine needle aspirates. *Acta cytologica* 2000; **44**(2): 223-6.
184. Davila JI, Starr JS, Attia S, et al. Comprehensive genomic profiling of a rare thyroid follicular dendritic cell sarcoma. *Rare tumors* 2017; **9**(2): 50-3.
185. Galati LT, Barnes EL, Myers EN. Dendritic cell sarcoma of the thyroid. *Head & Neck: Journal for the Sciences and Specialties of the Head and Neck* 1999; **21**(3): 273-5.
186. Yu L, Yang SJ. Primary follicular dendritic cell sarcoma of the thyroid gland coexisting with Hashimoto's thyroiditis. *International journal of surgical pathology* 2011; **19**(4): 502-5.
187. Naruse T, Koike A, Suzumura K, Matsumoto K, Inamura Y, Saigusa J. Malignant "Triton" tumor in the thyroid—A case report—. *The Japanese journal of surgery* 1991; **21**(4): 466-70.
188. Boos S, Meyer E, Wimmer B, Windfuhr M. Malignant triton tumor of the thyroid gland. *Radiation medicine* 1991; **9**(4): 159-61.
189. Chung DH, Kim NR, Kim T, et al. Malignant glomus tumor of the thyroid gland where is heretofore an unreported organ: a case report and literature review. *Endocrine pathology* 2015; **26**(1): 37-44.
190. Liu Y, Wu R, Yu T, Cao Y, Lu L. Malignant glomus tumor of the thyroid gland: a case report. *Journal of International Medical Research* 2019; **47**(6): 2723-7.
191. Poniecka A, Ghorab Z, Arnold D, Khaled A, Ganjei-Azar P. Kaposi's sarcoma of the thyroid gland in an HIV-negative woman: a case report. *Acta cytologica* 2007; **51**(3): 421-3.
192. Krauth PH, Katz JF. Kaposi's sarcoma involving the thyroid in a patient with AIDS. *Clinical nuclear medicine* 1987; **12**(11): 848-9.
193. Mollison LC, Mijch A, McBride G, Dwyer B. Hypothyroidism due to destruction of the thyroid by Kaposi's sarcoma. *Reviews of infectious diseases* 1991; **13**(5): 826-7.
194. Zhang X, El-Sahrigy D, Elhosseiny A, Melamed MR. Simultaneous cytomegalovirus infection and Kaposi's sarcoma of the thyroid diagnosed by fine needle aspiration in an AIDS patient. A case report and first cytologic description of the two entities occurring together. *Acta cytologica* 2003; **47**(4): 645-8.
195. Whaley RD, Thompson LD. Primary Thyroid Gland Alveolar Soft Part Sarcoma. *Head and neck pathology* 2019: 1-6.
196. Cetin B, Buyukberber S, Senturk S, Uluoglu O, Coskun U, Benekli M. A previously unreported malignancy of the thyroid. *Medical Oncology* 2012; **29**(3): 1418-20.
197. Shi H, Wang C, Wei L, Lu S, Cao D. Malignant mesenchymoma of the thyroid: case report and literature review. *Tumori Journal* 2010; **96**(2): 345-8.

**B. Figure: A comparison of the molecular basis for the development of mesenchymal tumors and epithelial thyroid tumors:**

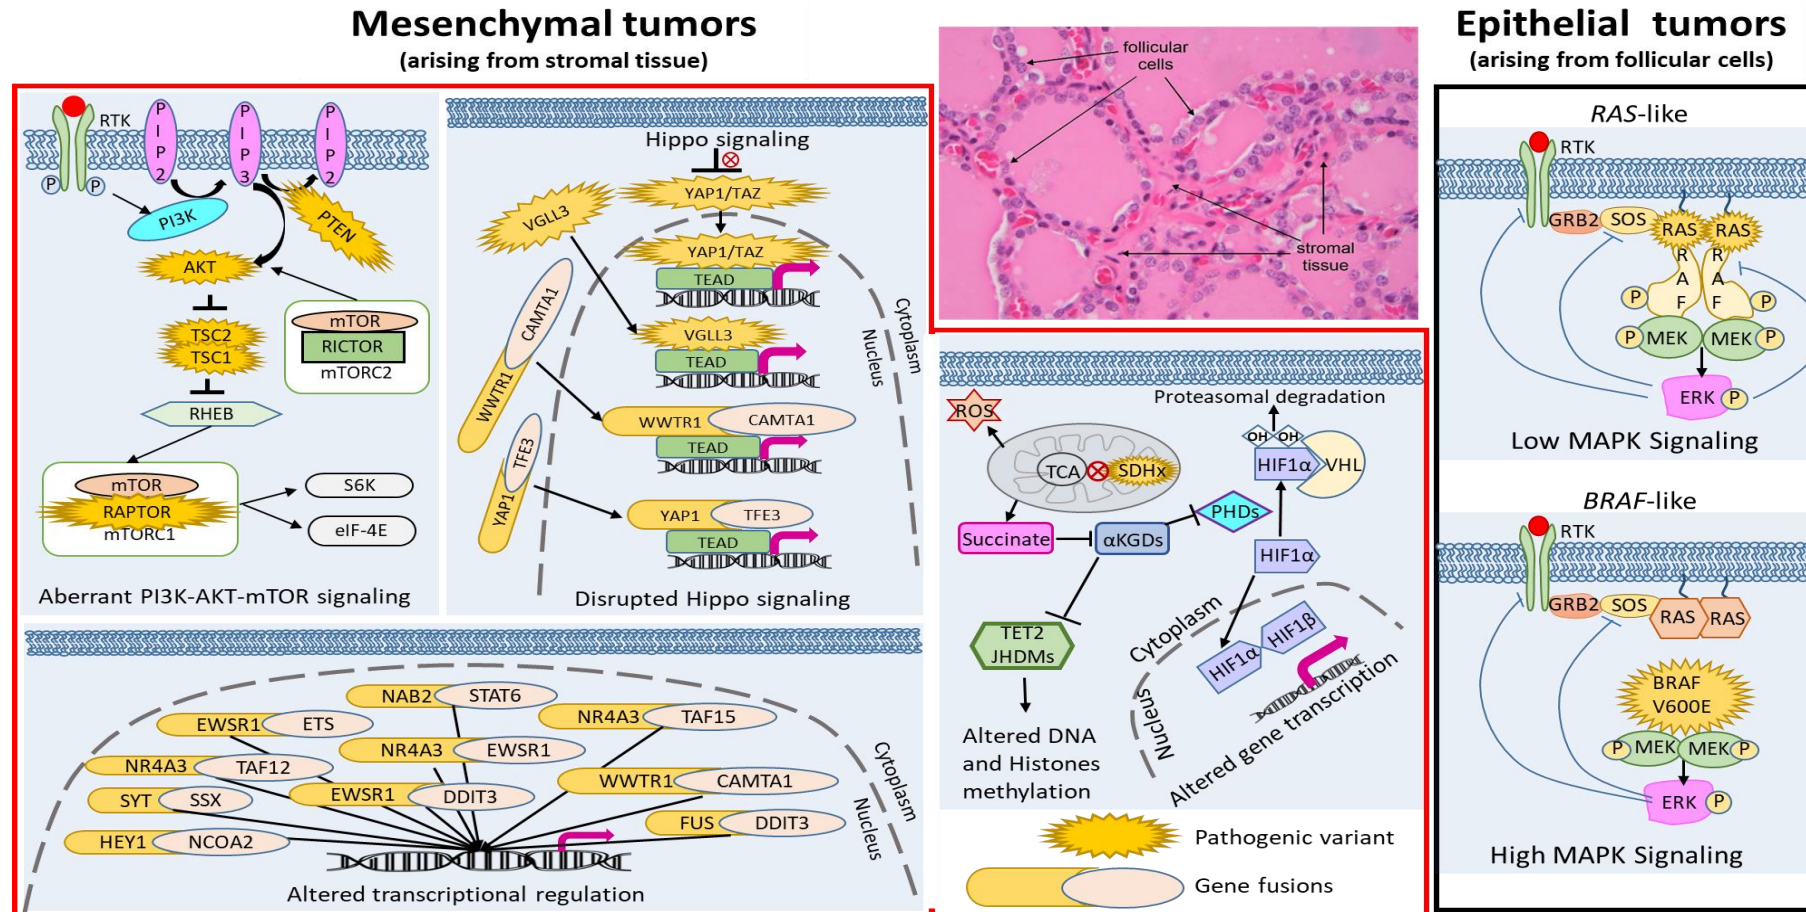

The figure illustrates and compares the molecular pathways driving the development of mesenchymal tumors and epithelial tumors.

**Mesenchymal tumors:** The exact molecular mechanism driving the formation of mesenchymal thyroid tumors is not fully elucidated, thus presented data are based on extrapolation from extrathyroidal mesenchymal tumors molecular signature. Altered PI3K-AKT signaling and hippo signaling have been reported in mesenchymal tumors. The hyperactive PI3K-AKT-mTOR signaling has been associated with the presence of pathogenic variants of the genes (*AKT*, *PTEN*, *TSC1*, *TSC2*, *RAPTOR*) that are involved in this pathway.<sup>1</sup> Similar presence of pathogenic variants of genes downstream of the hippo signaling promotes tumorigenesis.<sup>1</sup> The presence of *SDHx* pathogenic mutations within paragangliomas can lead to the disruption of the Krebs cycle (TCA) and thus resulting in the accumulation of succinate. The excess succinate competes with  $\alpha$ -ketoglutarate and inhibits the activity of  $\alpha$ -ketoglutarate dependent dioxygenases ( $\alpha$ KGDs) like TET2, JHDMS, and PHDs which results in the alteration of DNA and histones methylation status and activation of HIF $\alpha$  pathway under normoxic conditions, thus leading to cancer progression.<sup>2,3</sup> In addition to this, gene-fusions also alter the normal signaling and disrupt the transcriptional regulation of various genes which play an important role in proliferation, survival and cell death, however, the exact mechanism is not understood.<sup>4-12</sup>

**Epithelial thyroid tumors:** MAPK signaling is the most common signaling pathway to be altered in thyroid cancer of epithelial origin and this alteration has been associated with the presence of mutually exclusive pathogenic variants: *RAS* and *BRAF* (p.V600E). The RAS-like thyroid cancers are driven by mutated RAS protein which activates the downstream signaling pathways leading to ERK activation. The activated ERK inhibits the RAS signaling through a negative feedback loop leading to low MAPK signaling. In contrary to this, the BRAF-like tumors lead to the constitutive activation of the MEK-ERK signaling pathway which does not respond to the negative feedback signaling from ERK and thus, resulting in high MAPK signaling activation.<sup>13</sup>

**References for the figure:**

1. Abeshouse A, Adebamowo C, Adebamowo SN, et al. Comprehensive and integrated genomic characterization of adult soft tissue sarcomas. *Cell* 2017; **171**(4): 950-65. e28.
2. Cascon A, Remacha L, Calsina B, Robledo M. Pheochromocytomas and Paragangliomas: Bypassing Cellular Respiration. *Cancers (Basel)* 2019; **11**(5).
3. Bardella C, Pollard PJ, Tomlinson I. SDH mutations in cancer. *Biochim Biophys Acta* 2011; **1807**(11): 1432-43.
4. Yu JSE, Colborne S, Hughes CS, Morin GB, Nielsen TO. The FUS-DDIT3 Interactome in Myxoid Liposarcoma. *Neoplasia* 2019; **21**(8): 740-51.
5. Arvand A, Denny CT. Biology of EWS/ETS fusions in Ewing's family tumors. *Oncogene* 2001; **20**(40): 5747-54.
6. Benini S, Cocchi S, Gamberi G, et al. Diagnostic utility of molecular investigation in extraskeletal myxoid chondrosarcoma. *J Mol Diagn* 2014; **16**(3): 314-23.
7. Antonescu CR, Le Loarer F, Mosquera JM, et al. Novel YAP1-TFE3 fusion defines a distinct subset of epithelioid hemangioendothelioma. *Genes Chromosomes Cancer* 2013; **52**(8): 775-84.
8. Bode-Lesniewska B, Frigerio S, Exner U, Abdou MT, Moch H, Zimmermann DR. Relevance of translocation type in myxoid liposarcoma and identification of a novel EWSR1-DDIT3 fusion. *Genes Chromosomes Cancer* 2007; **46**(11): 961-71.
9. Ladanyi M. Fusions of the SYT and SSX genes in synovial sarcoma. *Oncogene* 2001; **20**(40): 5755-62.
10. Panagopoulos I, Gorunova L, Bjerkehagen B, Boye K, Heim S. Chromosome aberrations and HEY1-NCOA2 fusion gene in a mesenchymal chondrosarcoma. *Oncol Rep* 2014; **32**(1): 40-4.
11. Guseva NV, Tanas MR, Stence AA, et al. The NAB2-STAT6 gene fusion in solitary fibrous tumor can be reliably detected by anchored multiplexed PCR for targeted next-generation sequencing. *Cancer Genet* 2016; **209**(7-8): 303-12.
12. Errani C, Zhang L, Sung YS, et al. A novel WWTR1-CAMTA1 gene fusion is a consistent abnormality in epithelioid hemangioendothelioma of different anatomic sites. *Genes Chromosomes Cancer* 2011; **50**(8): 644-53.
13. Cancer Genome Atlas Research N. Integrated genomic characterization of papillary thyroid carcinoma. *Cell* 2014; **159**(3): 676-90.
